# Supplementary figures and images for: Combining ionic liquids and supercritical fluids: in situ ATR-IR study of CO2 dissolved in two ionic liquids at high pressures
Source: Royal Society of Chemistry journal article supplement (doi:10.1039/b005514j), 2000-01-01

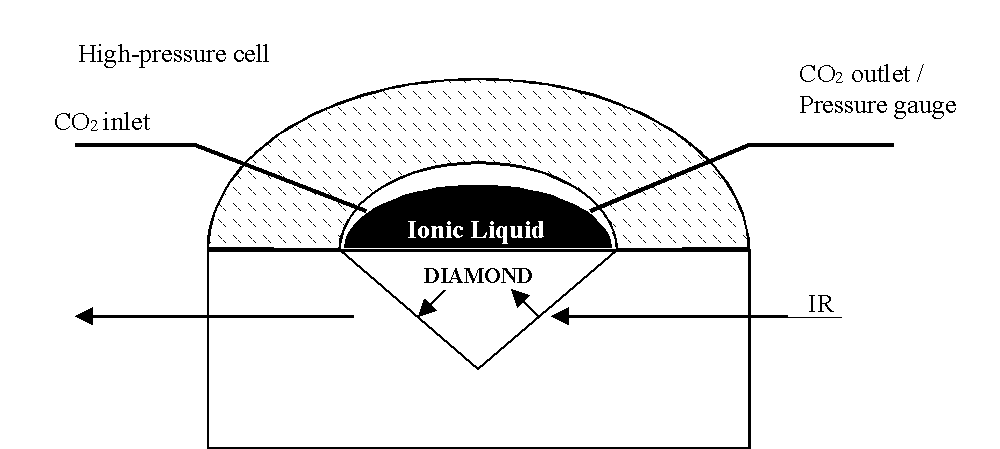

Supplement: b005514j.doc [file b005514j.doc]
